# Supplementary material for: Boosting reaction kinetics and improving long cycle life in lamellar VS2/MoS2 heterojunctions for superior sodium storage performance
Source: Royal Society of Chemistry journal article supplement (doi:10.1039/d1ta09612e), 2021-12-13
Supplement: d1ta09612e1.pdf [file d1ta09612e1.pdf]

## Supporting Information

### **Boosting reaction kinetics and improving long cycle life in lamellar VS<sub>2</sub>/MoS<sub>2</sub> Heterojunctions for superior sodium storage performance**

Runze Fan<sup>1</sup>, Chenyu Zhao<sup>1</sup>, Jiahui Ma<sup>1</sup>, Shulai Lei<sup>2,\*</sup>, Guijie Liang<sup>2</sup>, Tao He<sup>1</sup>,

Guocheng Zhu<sup>3</sup>, Yurong Cai<sup>1,\*</sup>

<sup>1</sup> The Key Laboratory of Advanced Textile Materials and Manufacturing Technology of Ministry of Education, National Engineering Lab for Textile Fiber Materials and Processing Technology, School of Materials Science and Engineering, Zhejiang Sci-Tech University, Hangzhou 310018, China

<sup>2</sup> Hubei Key Laboratory of Low Dimensional Optoelectronic Materials and Devices, Hubei University of Arts and Science, Xiangyang 441053, PR China

<sup>3</sup> College of Textile Science and Engineering (International institute of silk), Zhejiang Sci-Tech University, Hangzhou 310018, China

\* Corresponding author.

E-mail addresses: sllei@hbuas.edu.cn (Shulai Lei), caiyr@zstu.edu.cn (Yurong Cai).

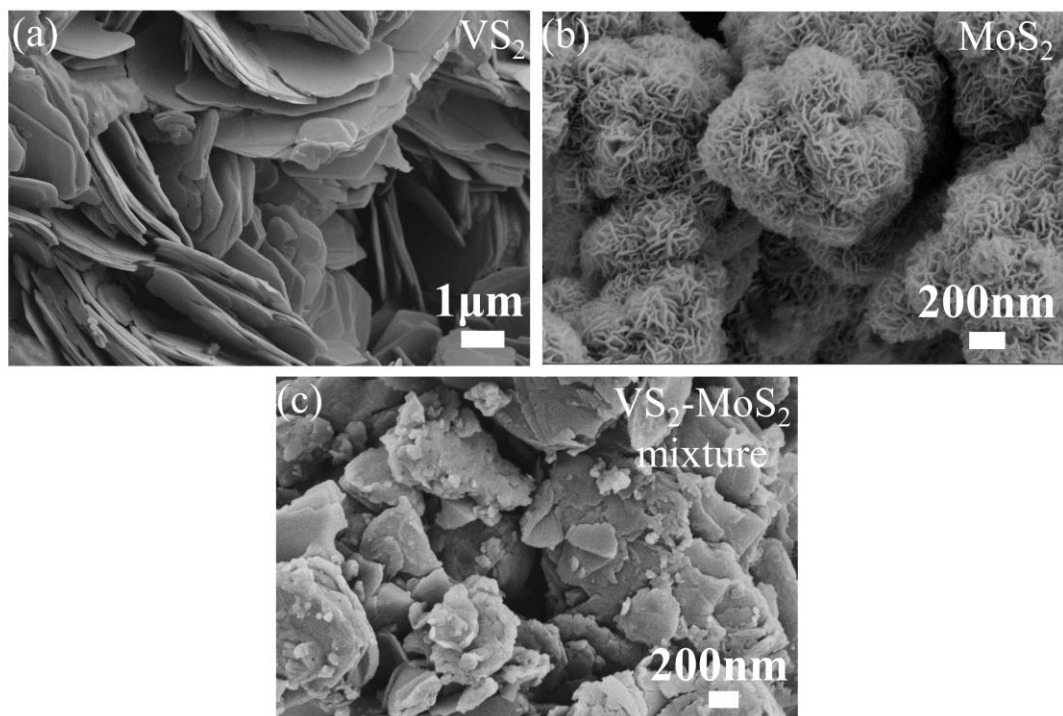

**Figure S1.** SEM patterns of the a) VS<sub>2</sub>, b) MoS<sub>2</sub> and c) VS<sub>2</sub>-MoS<sub>2</sub> mixture electrodes.

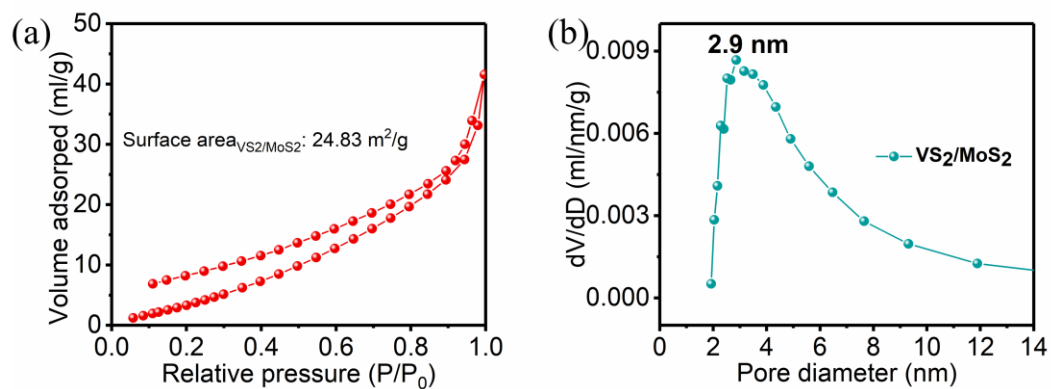

**Figure S2.** a) N<sub>2</sub> adsorption-desorption isotherms and b) pore size distribution (BJH model) of VS<sub>2</sub>/MoS<sub>2</sub>.

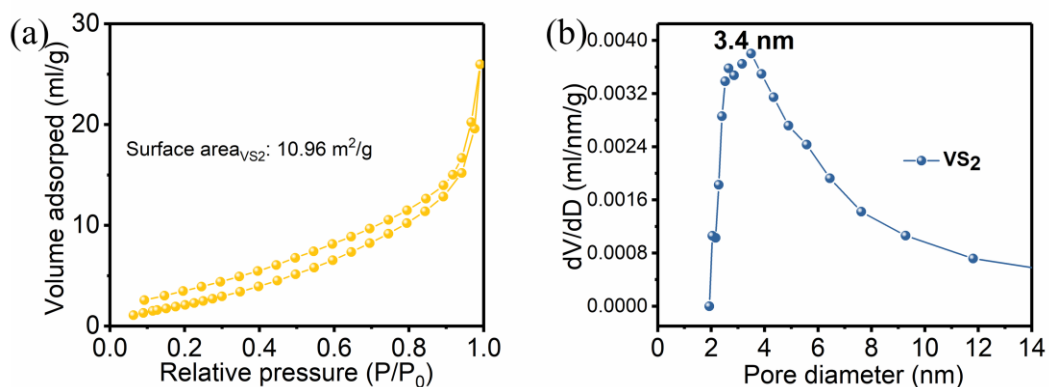

**Figure S3.** a) N<sub>2</sub> adsorption-desorption isotherms and b) pore size distribution (BJH model) of VS<sub>2</sub>.

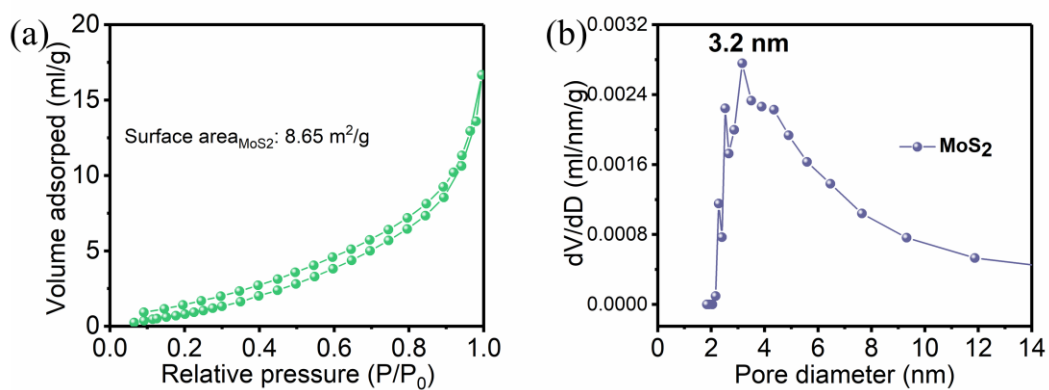

**Figure S4.** a) N<sub>2</sub> adsorption-desorption isotherms and b) pore size distribution (BJH model) of MoS<sub>2</sub>.

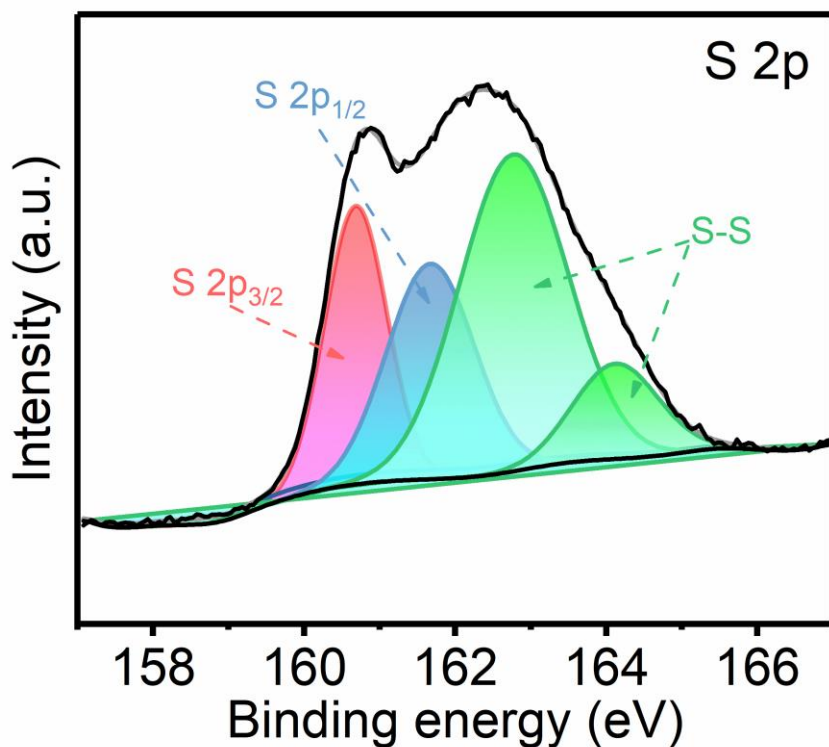

**Figure S5.** High-resolution XPS spectra of VS<sub>2</sub>/MoS<sub>2</sub>: S 2p.

The S 2p high-resolution XPS spectrum had two peaks at 160.67 eV and 161.66 eV, which were attributed to S 2p<sub>3/2</sub> and S 2p<sub>1/2</sub>, respectively. The other two peaks at 162.76 eV and 164.14 eV were ascribed to the supersaturated S-S bonds, which were formed due to the excessive TAA and anchored on the surface of sample. These results indicated that MoS<sub>2</sub> was successfully introduced into VS<sub>2</sub> to form a VS<sub>2</sub>/MoS<sub>2</sub> heterostructure.<sup>S1</sup>

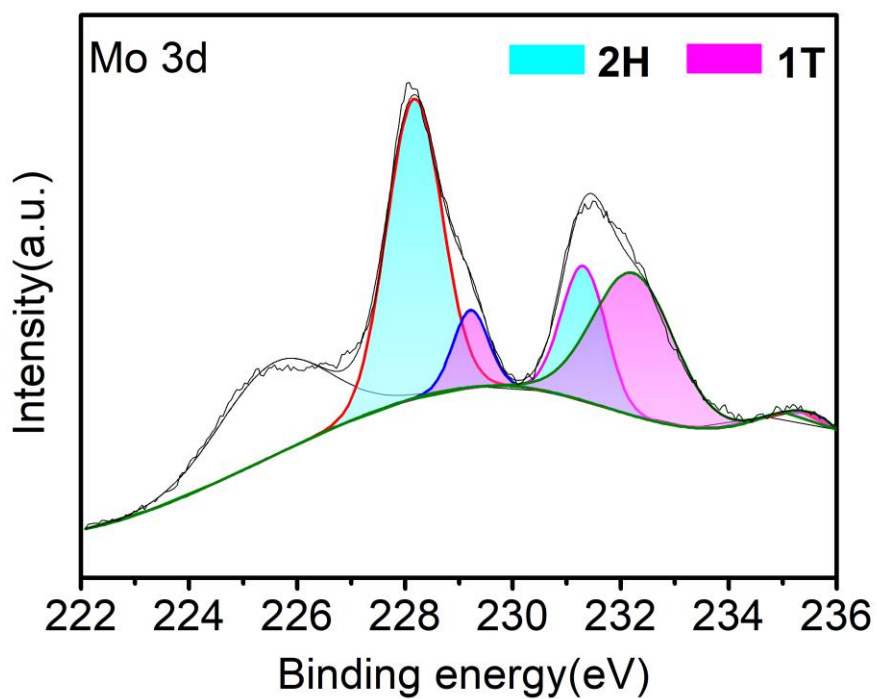

**Figure S6.** Mo 3d XPS spectra of the  $\text{VS}_2/\text{MoS}_2$  composite.

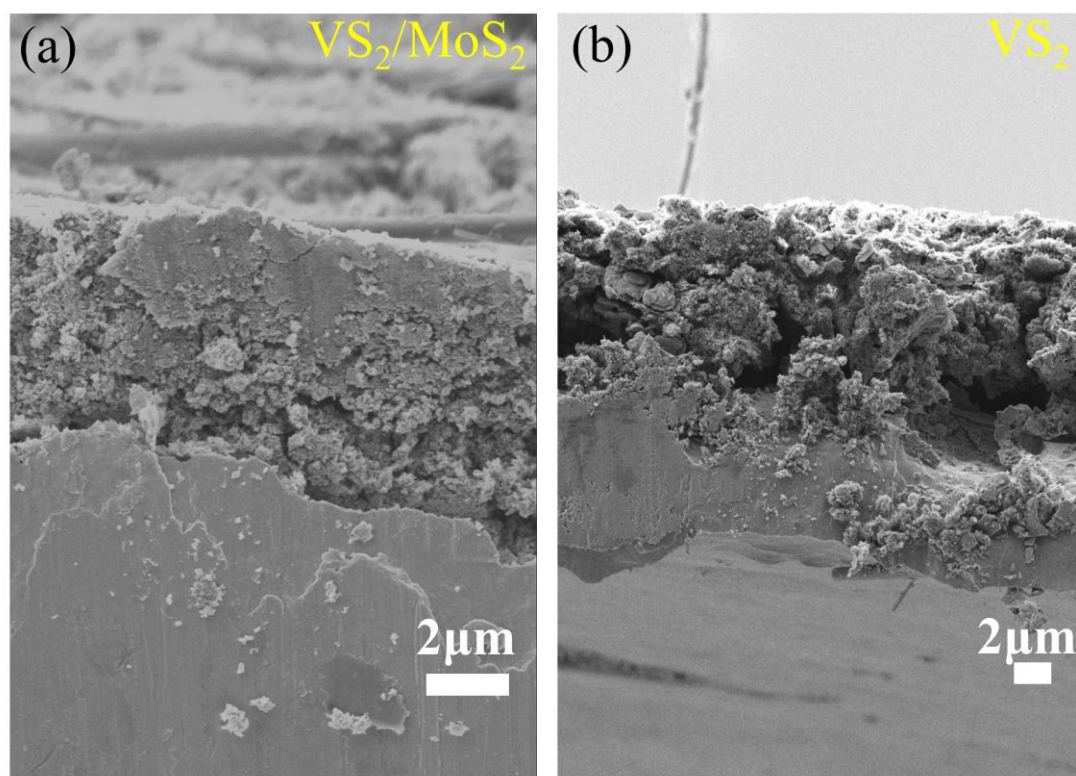

**Figure S7.** Cross-sectional SEM images of the a)  $\text{VS}_2/\text{MoS}_2$ , b)  $\text{VS}_2$  after 100 discharge-charge cycles at  $2 \text{ A g}^{-1}$ .

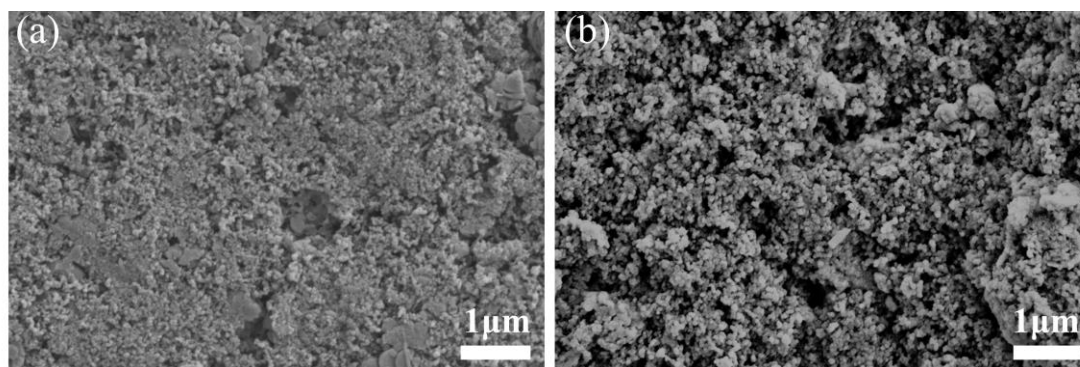

**Figure S8.** SEM images of VS<sub>2</sub>/MoS<sub>2</sub> a) for pristine electrode, b) after 200 discharge-charge cycles at 2 A g<sup>-1</sup>.

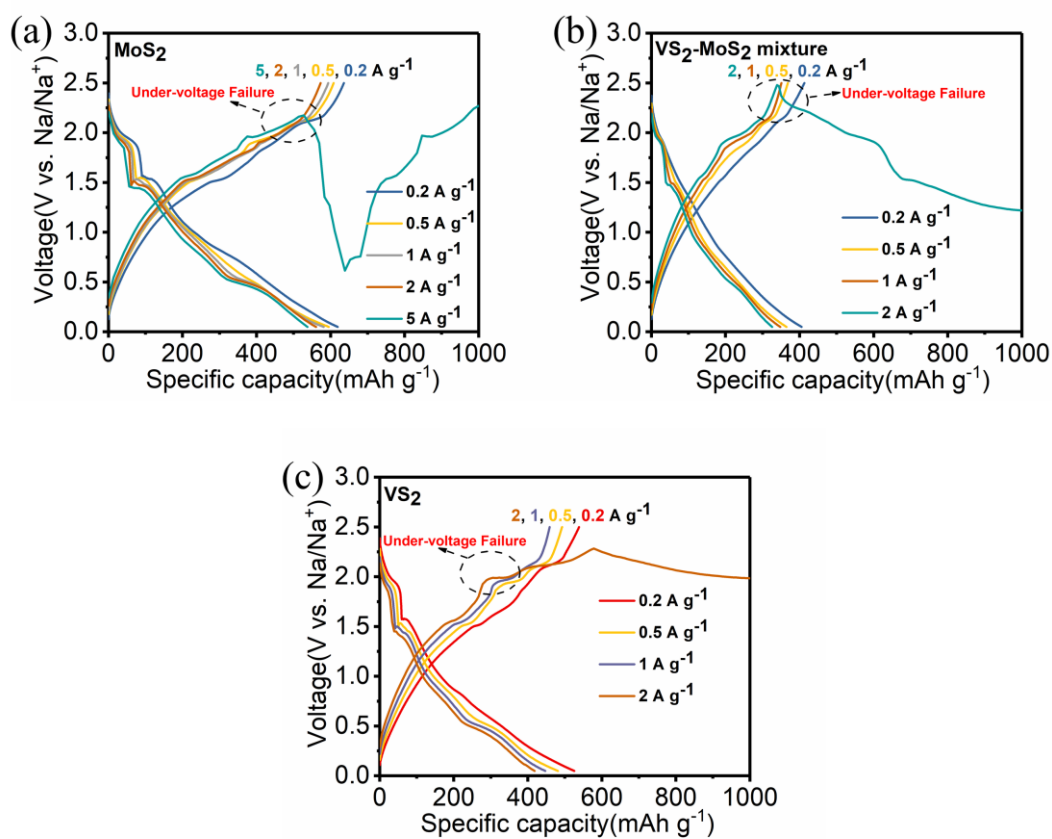

**Figure S9.** Abnormal discharge/charge patterns of a) MoS<sub>2</sub>, b) VS<sub>2</sub>-MoS<sub>2</sub> mixture and c) VS<sub>2</sub> anodes at different current densities.

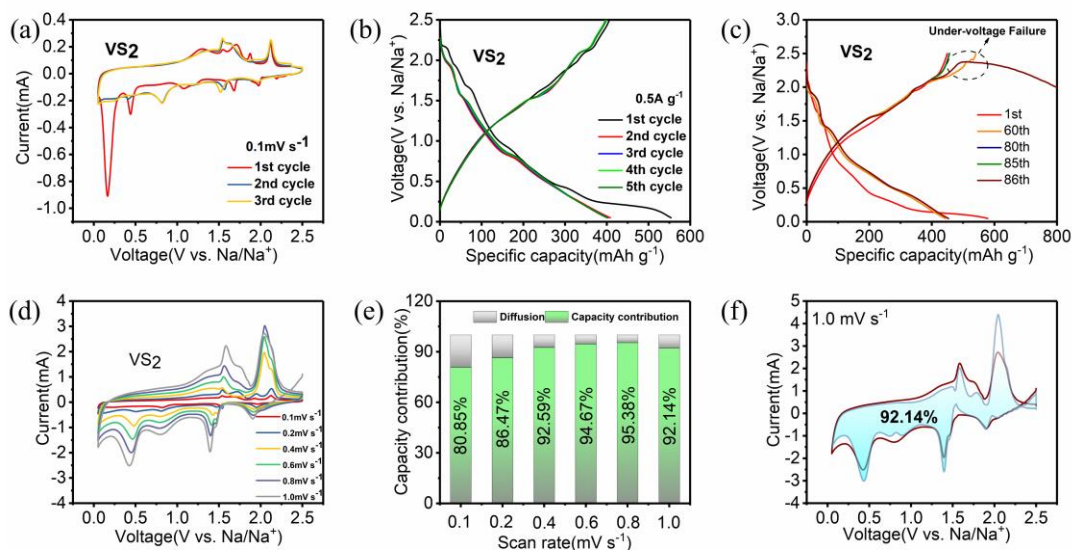

**Figure S10.** a) CV curves of VS<sub>2</sub> with initial three cycles at 0.1 mV s<sup>-1</sup>. b) Galvanostatic charge-discharge curves of VS<sub>2</sub> at 0.5 A g<sup>-1</sup> during the initial five cycles. c) Abnormal galvanostatic discharge/charge patterns of VS<sub>2</sub> anode at 2A g<sup>-1</sup>. d) CV curves of VS<sub>2</sub> electrode at various scan rates. e) Pseudocapacitive contribution of VS<sub>2</sub> at various scan rates. f) The ratio of diffusion and capacitive contribution to the total capacity at a scan rate of 1 mV s<sup>-1</sup> for VS<sub>2</sub> electrode.

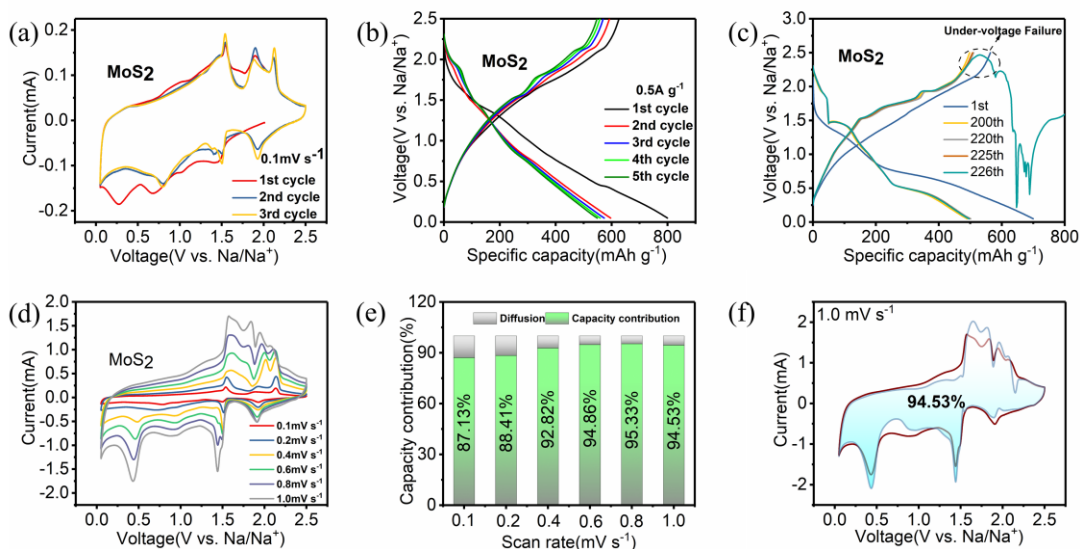

**Figure S11.** a) CV curves of MoS<sub>2</sub> with initial three cycles at 0.1 mV s<sup>-1</sup>. b) Galvanostatic charge-discharge curves of MoS<sub>2</sub> at 0.5 A g<sup>-1</sup> during the initial five cycles.

c) Abnormal galvanostatic discharge/charge patterns of MoS<sub>2</sub> anode at 2A g<sup>-1</sup>. d) CV curves of MoS<sub>2</sub> electrode at various scan rates. e) Pseudocapacitive contribution of MoS<sub>2</sub> at different scan rates. f) The ratio of diffusion and capacitive contribution to the total capacity at a scan rate of 1 mV s<sup>-1</sup> for MoS<sub>2</sub> electrode.

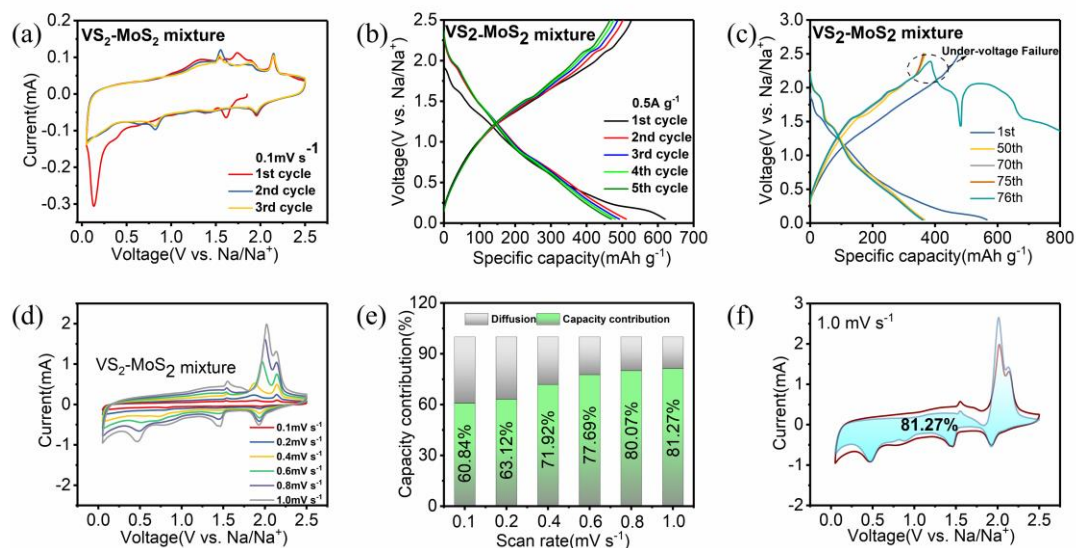

**Figure S12.** a) CV curves of VS<sub>2</sub>-MoS<sub>2</sub> mixture with initial three cycles at 0.1 mV s<sup>-1</sup>. b) Galvanostatic charge-discharge curves of VS<sub>2</sub>-MoS<sub>2</sub> mixture at 0.5 A g<sup>-1</sup> during the initial five cycles. c) Abnormal galvanostatic discharge/charge patterns of VS<sub>2</sub>-MoS<sub>2</sub> mixture anode at 2A g<sup>-1</sup>. d) CV curves of VS<sub>2</sub>-MoS<sub>2</sub> mixture electrode at various scan rates. e) Pseudocapacitive contribution of VS<sub>2</sub>-MoS<sub>2</sub> mixture at different scan rates. f) The ratio of diffusion and capacitive contribution to the total capacity at a scan rate of 1 mV s<sup>-1</sup> for VS<sub>2</sub>-MoS<sub>2</sub> mixture electrode.

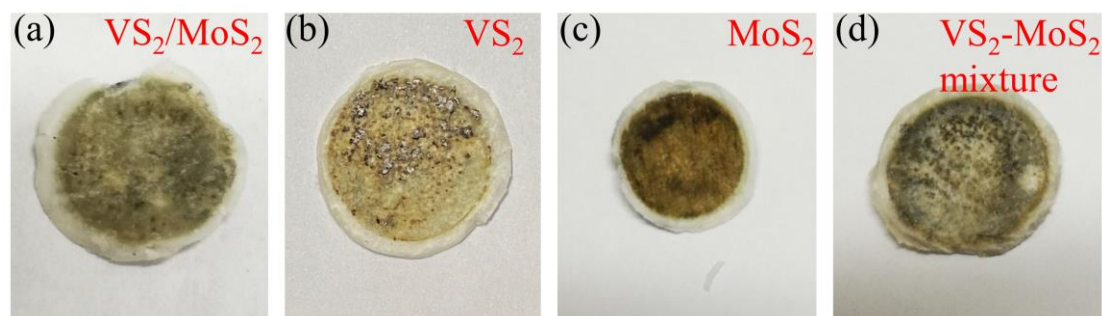



**Figure S13.** The photos of the separators from the spent a)  $\text{VS}_2/\text{MoS}_2$ , b)  $\text{VS}_2$ , c)  $\text{MoS}_2$  and d)  $\text{VS}_2\text{-MoS}_2$  mixture cells at  $2 \text{ A g}^{-1}$ .

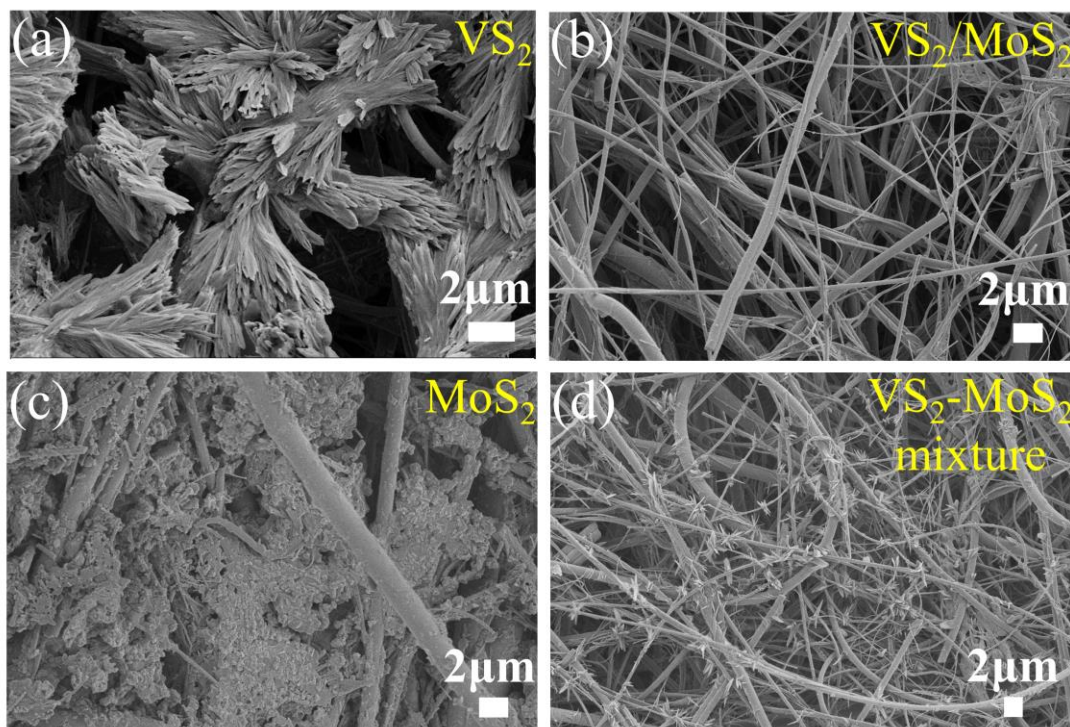

**Figure S14.** The SEM images of the separators from the spent a)  $\text{VS}_2$ , b)  $\text{VS}_2/\text{MoS}_2$ , c)  $\text{MoS}_2$  and d)  $\text{VS}_2\text{-MoS}_2$  mixture cells at  $2 \text{ A g}^{-1}$ .

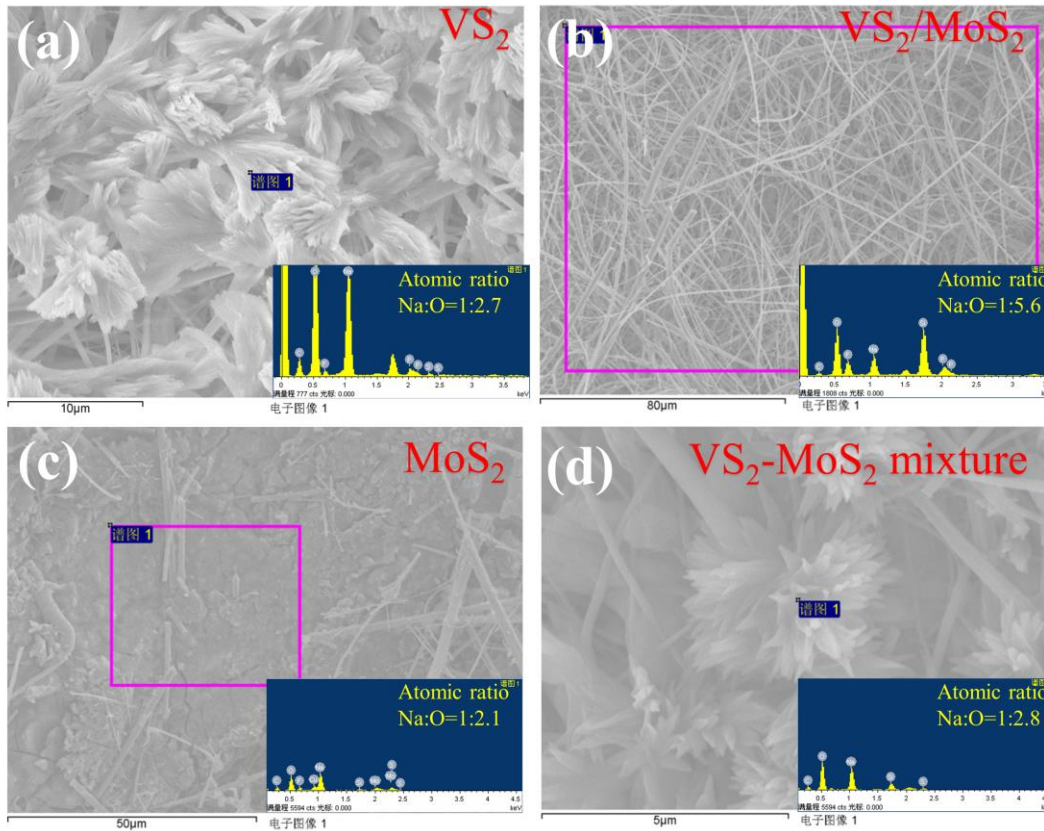

**Figure S15.** The energy dispersive X-ray spectrum (EDS) results of the spent separator from the a)  $\text{VS}_2$ , b)  $\text{VS}_2/\text{MoS}_2$ , c)  $\text{MoS}_2$  and d)  $\text{VS}_2\text{-MoS}_2$  mixture cells at  $2 \text{ A g}^{-1}$ .

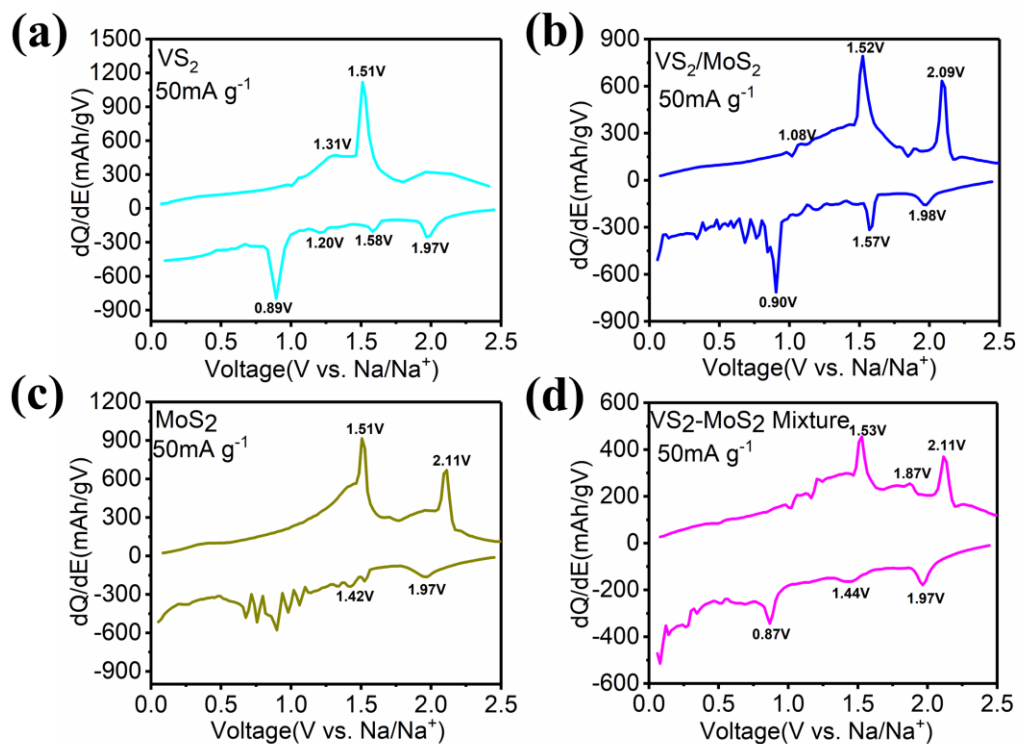

**Figure S16.** The  $dQ/dE$  patterns of a)  $VS_2$ , b)  $VS_2/MoS_2$ , c)  $MoS_2$  and d)  $VS_2-MoS_2$

mixture electrodes at  $50\text{ mA g}^{-1}$ , inset discharge/charge curves at  $50\text{ mA g}^{-1}$ .

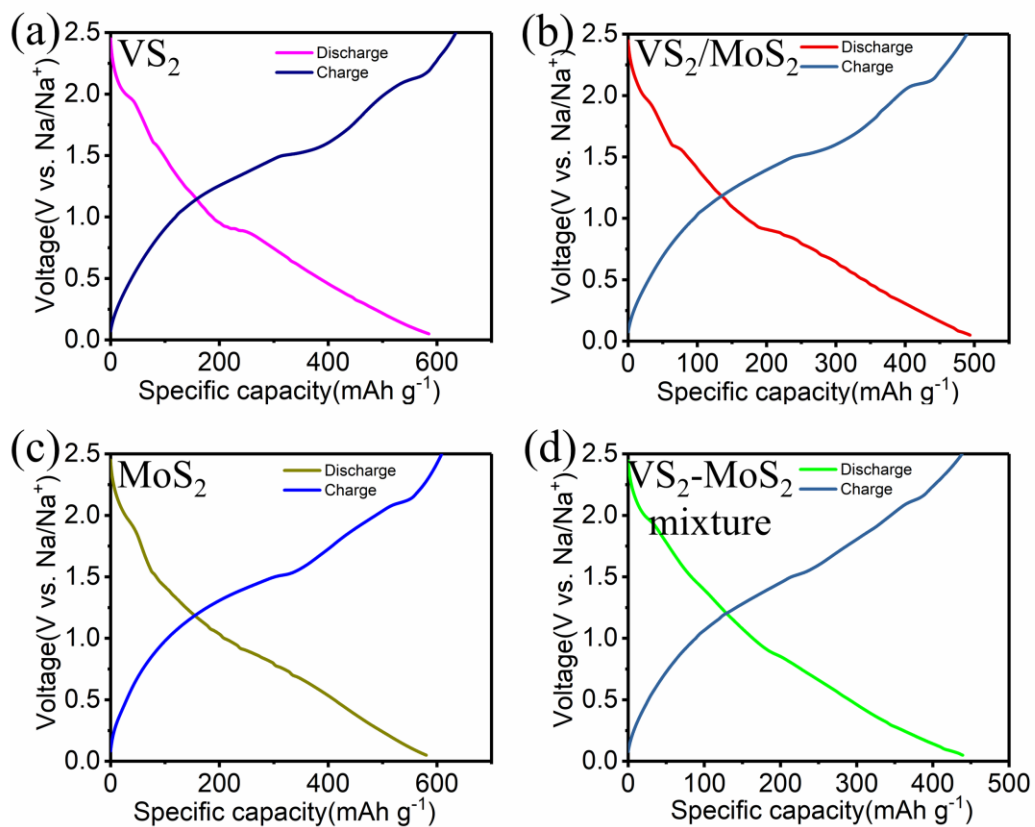

**Figure S17.** The discharge/charge curves at  $50\text{ mA g}^{-1}$  of a)  $VS_2$ , b)  $VS_2/MoS_2$ , c)  $MoS_2$

and d)  $VS_2-MoS_2$  mixture electrodes.

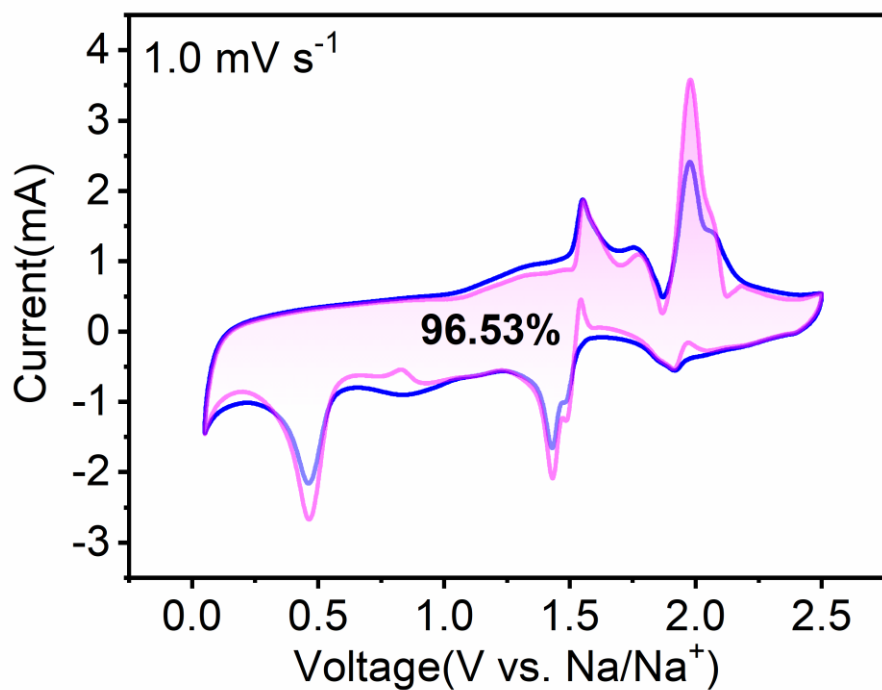

**Figure S18.** The ratio of diffusion and capacitive contribution to the total capacity at a scan rate of  $1 \text{ mV s}^{-1}$  for  $\text{VS}_2/\text{MoS}_2$  electrode.

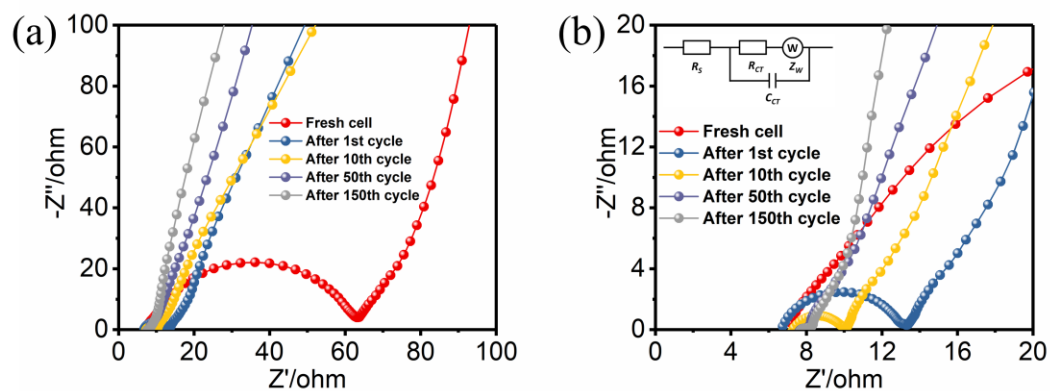

**Figure S19.** a) Nyquist plots after different cycles for the  $\text{VS}_2/\text{MoS}_2$  electrode, b) Enlarged view of Nyquist plots with different cycles and equivalent electric circuit (inset).

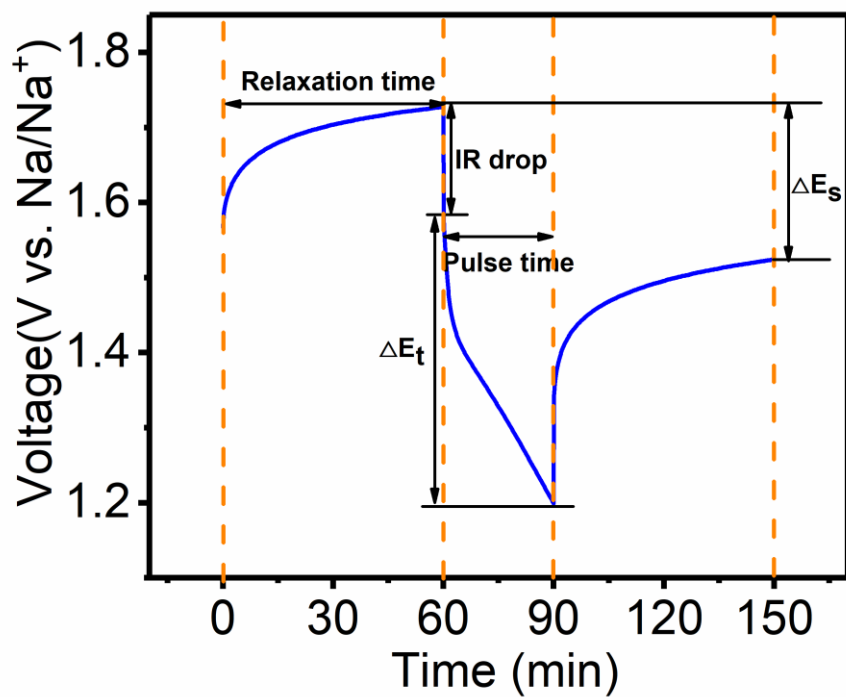

**Figure S20.** E vs.t curves of VS<sub>2</sub>/MoS<sub>2</sub> electrode for a single GITT during discharge process.

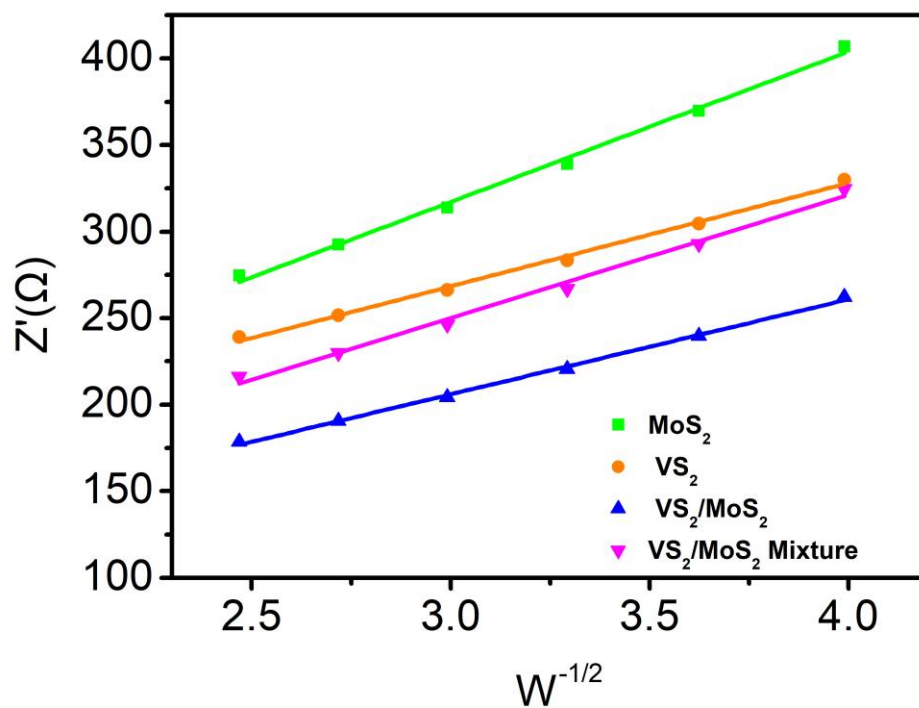

**Figure S21.** Relationship between  $Z'$  and  $\omega^{-1/2}$  of VS<sub>2</sub>/MoS<sub>2</sub>, VS<sub>2</sub>, MoS<sub>2</sub> and VS<sub>2</sub>-MoS<sub>2</sub>

mixture electrodes

According to the EIS results and Equations S2, Supporting Information, the relationship between  $Z'$  and  $\omega^{-1/2}$  is shown in Figure S15, Supporting Information.  $\sigma$  is the Warburg factor calculated from the slope of the lines between  $Z'$  and  $\omega^{-1/2}$ . And according to Equations S1, Supporting Information, when the R, T, A, F, n and C parameters are constant, the value of  $D_{Na^+}$  increases with the value of  $\sigma$  decreasing instead.<sup>S2</sup>

Equations S1, S2.

$$D_{Na^+} = \frac{R^2 T^2}{2n^4 F^4 A^2 C^2 \sigma^2} \quad (S1)$$

$$Z' = R_s + R_{ct} + \sigma \omega^{-1/2} (S2)$$

Where R, T, A, F, n and C represent the gas constant, absolute temperature, electrode surface area, Faraday's constant, molar electron transfer number and molar concentration of  $Na^+$ , respectively. And  $\sigma$  is the Warburg factor calculated from the slope of the lines between  $Z'$  and  $\omega^{-1/2}$ .

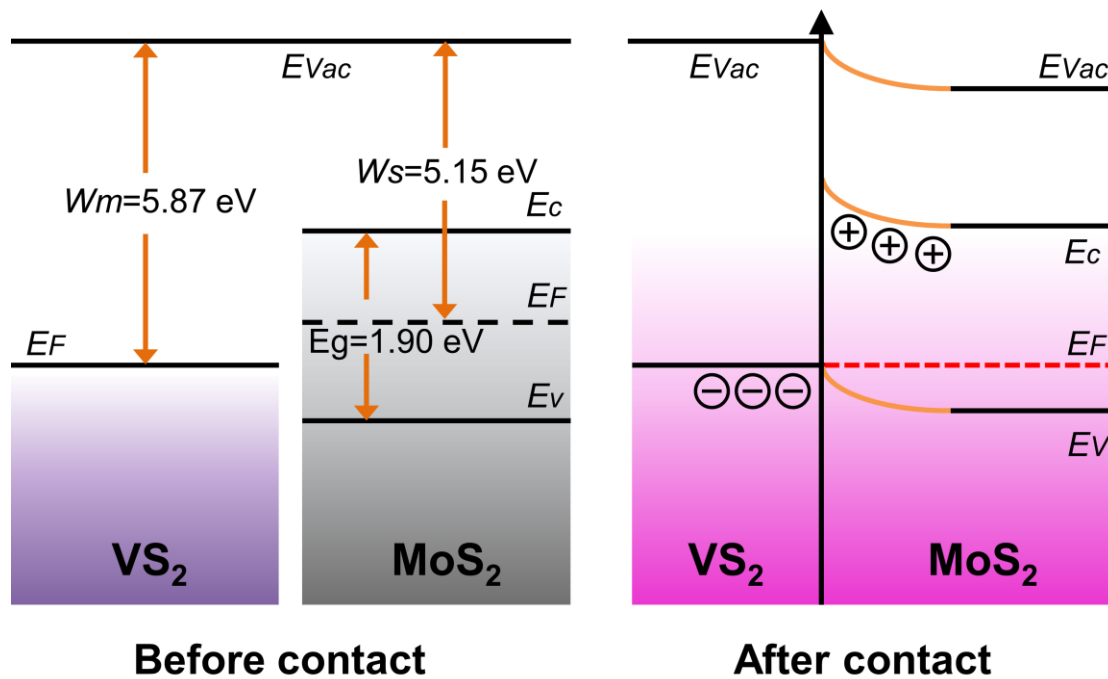

**Figure S22.** Energy band diagram before and after contact between metal VS<sub>2</sub> and semiconductor MoS<sub>2</sub>, where  $E_{vac}$ ,  $E_c$ ,  $E_F$ ,  $E_v$ ,  $E_g$ , and  $W$  represent vacuum energy, conduction band, Fermi level, valence band, band gap, and work function, respectively.

**Table S1.** Comparison of the rate capability and cycling stability of VS<sub>2</sub>/MoS<sub>2</sub> with other VS<sub>2</sub> or MoS<sub>2</sub> based anodes for SIBs.

| Materials                                            | Specific capacities                                   | Cycle life                                        | Reference                                                   |
|------------------------------------------------------|-------------------------------------------------------|---------------------------------------------------|-------------------------------------------------------------|
| Co <sub>9</sub> S <sub>8</sub> /MoS <sub>2</sub> -CN | 438 mAh g <sup>-1</sup> at 1A<br>g <sup>-1</sup>      | 421 mAh g <sup>-1</sup> after<br>250 cycles at 2A | <i>J. Mater. Chem.</i><br><i>A</i> , 2018, <b>6</b> , 4776- |
|                                                      | 275 mAh g <sup>-1</sup> at 20 A<br>g <sup>-1</sup>    | g <sup>-1</sup>                                   | 4782.                                                       |
| VS <sub>2</sub> NSA                                  | 700 mAh g <sup>-1</sup> at 0.1A<br>g <sup>-1</sup>    | ≈500 mAh g <sup>-1</sup><br>after 200 cycles      | <i>Adv. Mater.</i> ,<br>2017, <b>29</b> ,                   |
|                                                      | 400 mAh g <sup>-1</sup> at 2 A<br>g <sup>-1</sup>     | at 1A g <sup>-1</sup>                             | 1702061.                                                    |
| ce-V <sub>5</sub> S <sub>8</sub> -C                  | 616 mAh g <sup>-1</sup> at 0.5A<br>g <sup>-1</sup>    | 496 mAh g <sup>-1</sup> after<br>500 cycles at 1A | <i>Energy Environ.</i><br><i>Sci.</i> , 2017, <b>10</b> ,   |
|                                                      | 344 mAh g <sup>-1</sup> at 10 A<br>g <sup>-1</sup>    | g <sup>-1</sup>                                   | 107-113.                                                    |
| VMoS <sub>2</sub> -43                                | 548.1 mAh g <sup>-1</sup> at 0.1<br>A g <sup>-1</sup> | 451.6 mAh g <sup>-1</sup><br>after 800 cycles     | <i>Chem. Eng. J.</i> ,<br>2021, <b>417</b> ,                |
|                                                      | 305.6 mAh g <sup>-1</sup> at 10<br>A g <sup>-1</sup>  | at 2A g <sup>-1</sup>                             | 128107.                                                     |
| c-VS <sub>2</sub> @VOOH                              | 424 mAh g <sup>-1</sup> at 0.1A<br>g <sup>-1</sup>    | 330 mAh g <sup>-1</sup> after<br>150 cycles at    | <i>J. Mater. Chem.</i><br><i>A</i> , 2017, <b>5</b> ,       |
|                                                      | 113 mAh g <sup>-1</sup> at 5A                         | 0.2A g <sup>-1</sup>                              | 20217-                                                      |



|                                                      |                                                                                                          |                                                                         |                                                                  |
|------------------------------------------------------|----------------------------------------------------------------------------------------------------------|-------------------------------------------------------------------------|------------------------------------------------------------------|
|                                                      | $\text{g}^{-1}$                                                                                          |                                                                         | 20227.                                                           |
| BD-MoS <sub>2</sub>                                  | 354 mAh $\text{g}^{-1}$ at 0.5A<br>$\text{g}^{-1}$<br>262 mAh $\text{g}^{-1}$ at 5 A<br>$\text{g}^{-1}$  | 350 mAh $\text{g}^{-1}$ after<br>1000 cycles at 2A<br>$\text{g}^{-1}$   | <i>Small</i> , 2019, <b>15</b> ,<br>e1805405.                    |
| Nb <sub>2</sub> CTx@MoS <sub>2</sub> @C              | 530 mAh $\text{g}^{-1}$ at 0.1A<br>$\text{g}^{-1}$<br>454 mAh $\text{g}^{-1}$ at 5A<br>$\text{g}^{-1}$   | 403 mAh $\text{g}^{-1}$ after<br>2000 cycles at<br>1A $\text{g}^{-1}$   | <i>ACS Nano</i> , 2021,<br><b>15</b> , 7439-7450.                |
| MoS <sub>2</sub> /G                                  | 432 mAh $\text{g}^{-1}$ at 0.1A<br>$\text{g}^{-1}$<br>324 mAh $\text{g}^{-1}$ at 10A<br>$\text{g}^{-1}$  | 421 mAh $\text{g}^{-1}$ after<br>250 cycles at<br>0.3A $\text{g}^{-1}$  | <i>Adv. Energy<br/>Mater.</i> ,<br>2017, <b>8</b> ,<br>1702383.  |
| Fe <sub>9</sub> S <sub>10</sub> @MoS <sub>2</sub> @C | 443 mAh $\text{g}^{-1}$ at 0.5A<br>$\text{g}^{-1}$<br>197 mAh $\text{g}^{-1}$ at 30 A<br>$\text{g}^{-1}$ | 355 mAh $\text{g}^{-1}$ after<br>1000 cycles at 2A<br>$\text{g}^{-1}$   | <i>Energy Storage<br/>Mater.</i> , 2020, <b>24</b> ,<br>208-219. |
| VS <sub>2</sub> /MoS <sub>2</sub>                    | 781.9 mAh $\text{g}^{-1}$ at<br>0.5A $\text{g}^{-1}$<br>644.0 mAh $\text{g}^{-1}$ at 10                  | 454.5 mAh $\text{g}^{-1}$<br>after 1000 cycles<br>at 2A $\text{g}^{-1}$ | This study                                                       |

---

$$A g^{-1}$$

**Table S2.** Fitting results of EIS for various samples with the proposed equivalent circuit.

| Samples                                   | $R_s(\Omega)$ | $R_{ct}(\Omega)$ |
|-------------------------------------------|---------------|------------------|
| VS <sub>2</sub>                           | 1.306         | 87.06            |
| MoS <sub>2</sub>                          | 6.091         | 135.5            |
| VS <sub>2</sub> -MoS <sub>2</sub> mixture | 5.824         | 104.6            |
| VS <sub>2</sub> /MoS <sub>2</sub>         | 5.36          | 66.37            |

$R_s$  represents the series resistance;  $R_{ct}$  indicates the charge-transfer resistance and CPE expresses the constant phase element.

**Table S3.** Simulated impedance parameters ( $R_s$  and  $R_{ct}$ ) of VS<sub>2</sub>/MoS<sub>2</sub> electrode.

| Cycle number      | $R_s(\Omega)$ | $R_{ct}(\Omega)$ |
|-------------------|---------------|------------------|
| Fresh cell        | 7.687         | 56.41            |
| After 1st cycle   | 6.942         | 5.685            |
| After 10th cycle  | 7.524         | 2.208            |
| After 50th cycle  | 7.727         | 0.207            |
| After 150th cycle | 7.771         | 0.232            |

#### References:

- S1 X. Yue, J. Wang, A. M. Patil, X. An, Z. Xie, X. Hao, Z. Jiang, A. Abudula and G. Guan, *Chem. Eng. J.*, 2021, **417**, 128107.
- S2 D. Wang, L. Cao, D. Luo, R. Gao, H. Li, D. Wang, G. Sun, Z. Zhao, N. Li, Y. Zhang,

F. Du, M. Feng and Z. Chen, *Nano Energy*, 2021, **87**, 106185.
